# Supplementary material for: Investigating the Immunomodulatory Potential of Dental Pulp Stem Cell Cultured on Decellularized Bladder Hydrogel towards Macrophage Response In Vitro
Source: MDPI journal article supplement (doi:10.3390/gels8030187), 2022-03-18
Supplement: s1 [file s1]

## SUPPLEMENTARY MATERIALS

**Table S1.** Primer sequence

| Target gene   | Forward primer (5' to 3') | Reverse primer (5' to 3') |
|---------------|---------------------------|---------------------------|
| TNF- $\alpha$ | GGTGCCTATGTCTCAGCCTCTT    | GGTGCCTATGTCTCAGCCTCTT    |
| IL-10         | CGGGAAGACAATAACTGCACCC    | CGGGAAGACAATAACTGCACCC    |
| GAPDH         | CATCACTGCCACCCAGAAGACTG   | ATGCCAGTGAGCTTCCCGTTCAG   |

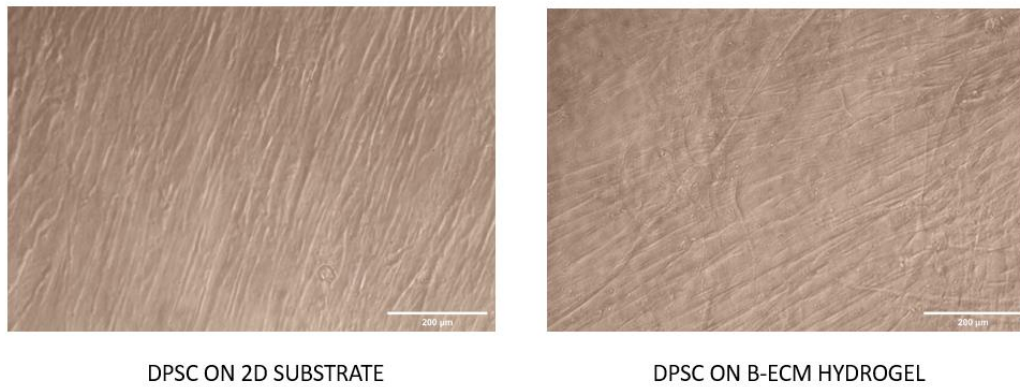

**Figure S1.** Optical image of DPSC cultured on 2D substrate and on B-ECM hydrogel (scale bar = 200  $\mu\text{m}$ ).

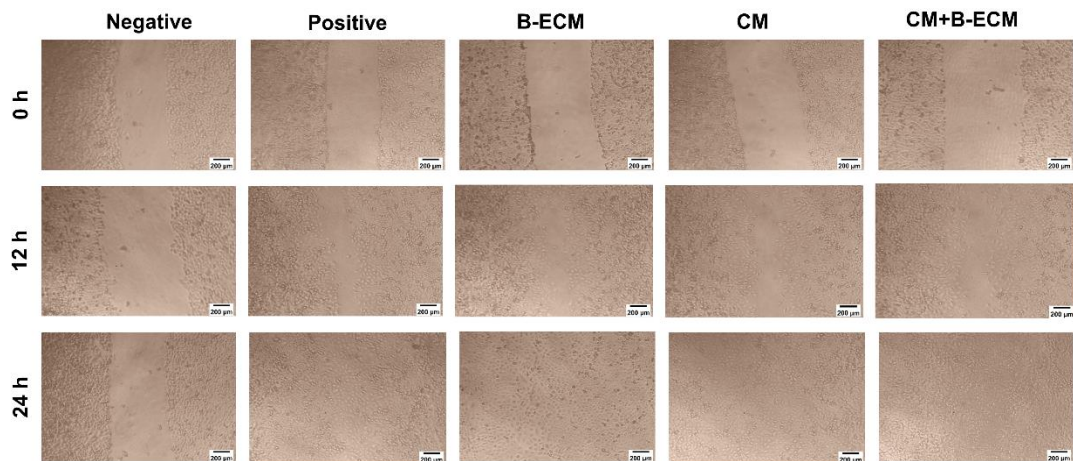

**Figure S2.** Optical image of wound healing assay of A549 cells after 12 and 24 h (scale bar = 200  $\mu\text{m}$ ).
